# Supplementary material for: A Short History Of Modernist Painting
Source: PLOS journal article supplement (doi:10.1371/journal.pone.0220748), 1980-01-01
Supplement: S7 (10.1371/journal.pone.0220748.s007) [file journal.pone.0220748.s007]

## Results of the analysis of the refresh phase

Learning continued during refresh phase for group G75.

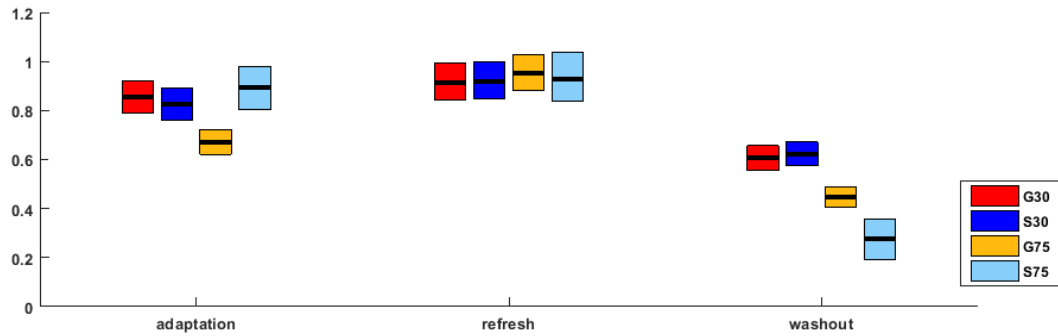

**Fig. 1: Adaptation, refresh and washout.** Group means and their HDIs of posterior probability distributions for the last episode of adaptation, all six refresh episodes and the first washout episode.

|     | Adaptation | Refresh | Washout        |
|-----|------------|---------|----------------|
|     | S75        | S75     | S75            |
| G30 | 43 %       | 56 %    | < <b>0.1 %</b> |
| S30 | 8 %        | 56 %    | < <b>0.1 %</b> |
| G75 | 8 %        | 54 %    | < <b>0.1 %</b> |
|     | G75        | G75     | G75            |
| G30 | 19 %       | 55 %    | 7 %            |
| S30 | 64 %       | 57 %    | 18 %           |
|     | S30        | S30     | S30            |
| G30 | 19 %       | 65 %    | 67 %           |

**Tab. 1: Results of between group analysis for adaptation, refresh and washout.** Effective equality of posterior distribution of the differences between the estimates of the four group indices of adaptation, refresh and washout indices using a ROPE of -0.05 to 0.05. Significant differences are marked in bold numbers.

|         | <b>G30</b>     | <b>S30</b>     | <b>G75</b>     | <b>S75</b>     |
|---------|----------------|----------------|----------------|----------------|
|         | adaptation     | adaptation     | adaptation     | adaptation     |
| refresh | 39 %           | 25 %           | < <b>0.1 %</b> | 39 %           |
| washout | < <b>0.1 %</b> | < <b>0.1 %</b> | < <b>0.1 %</b> | < <b>0.1 %</b> |
|         | refresh        | refresh        | refresh        | refresh        |
| washout | < <b>0.1 %</b> | < <b>0.1 %</b> | < <b>0.1 %</b> | < <b>0.1 %</b> |

**Tab. 2: Tab. 1: Results of within group analysis for adaptation, refresh and washout.**

Effective equality of posterior distribution of the differences between the estimates of the adaptation, refresh and washout indices within each group using a ROPE of -0.05 to 0.05. Significant differences are marked in bold numbers.
